# Supplementary material for: The amyloid precursor protein is a conserved Wnt receptor
Source: eLife journal article supplement (doi:10.7554/elife.69199), 2021-09-09

Figure S6A-Source data

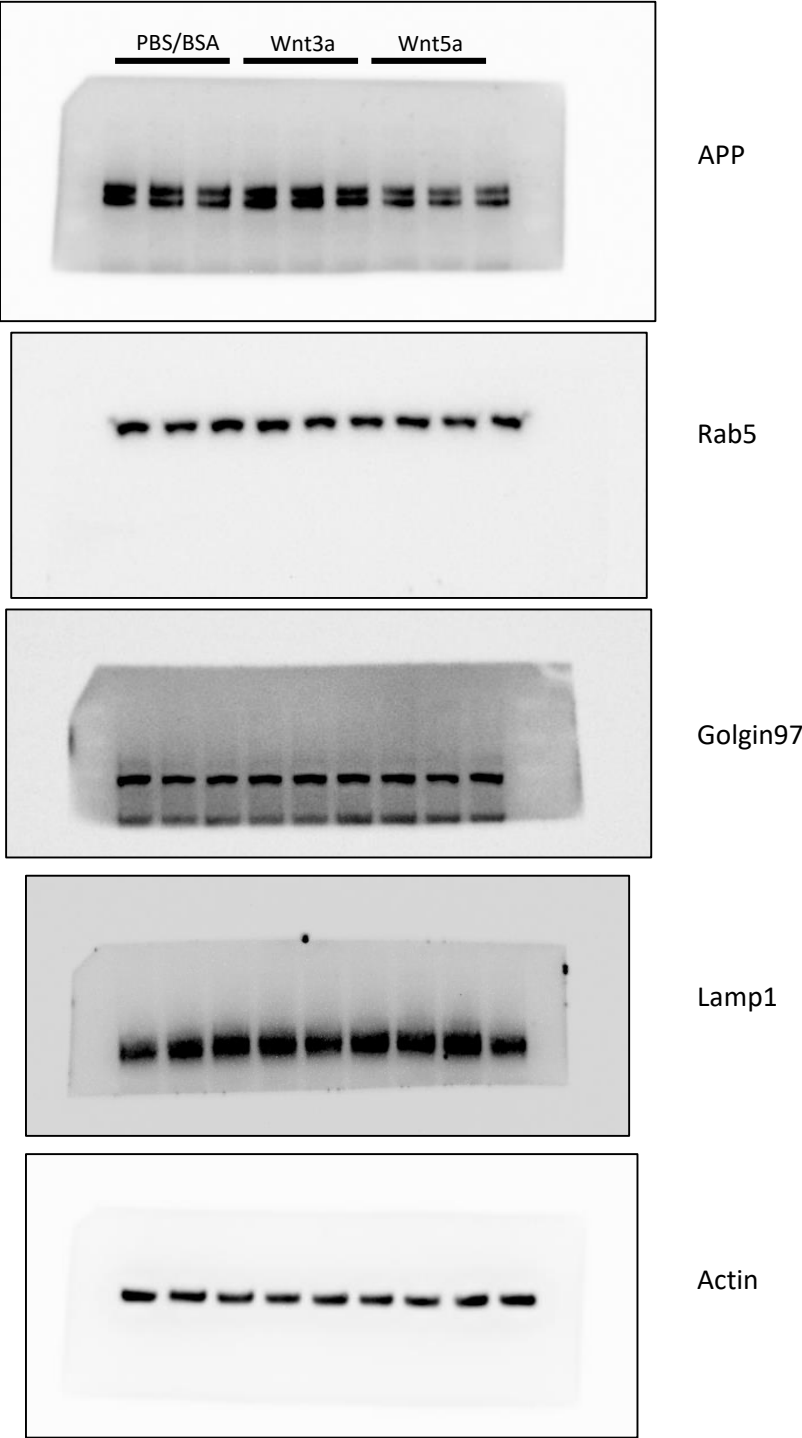

Figure S7A-Source data

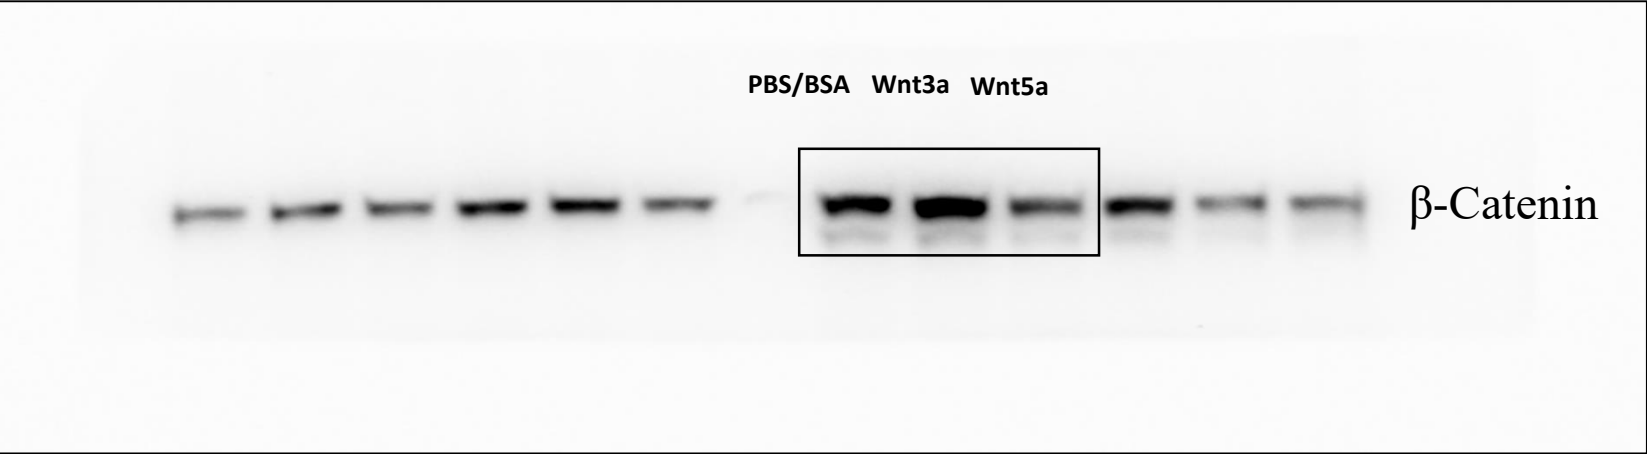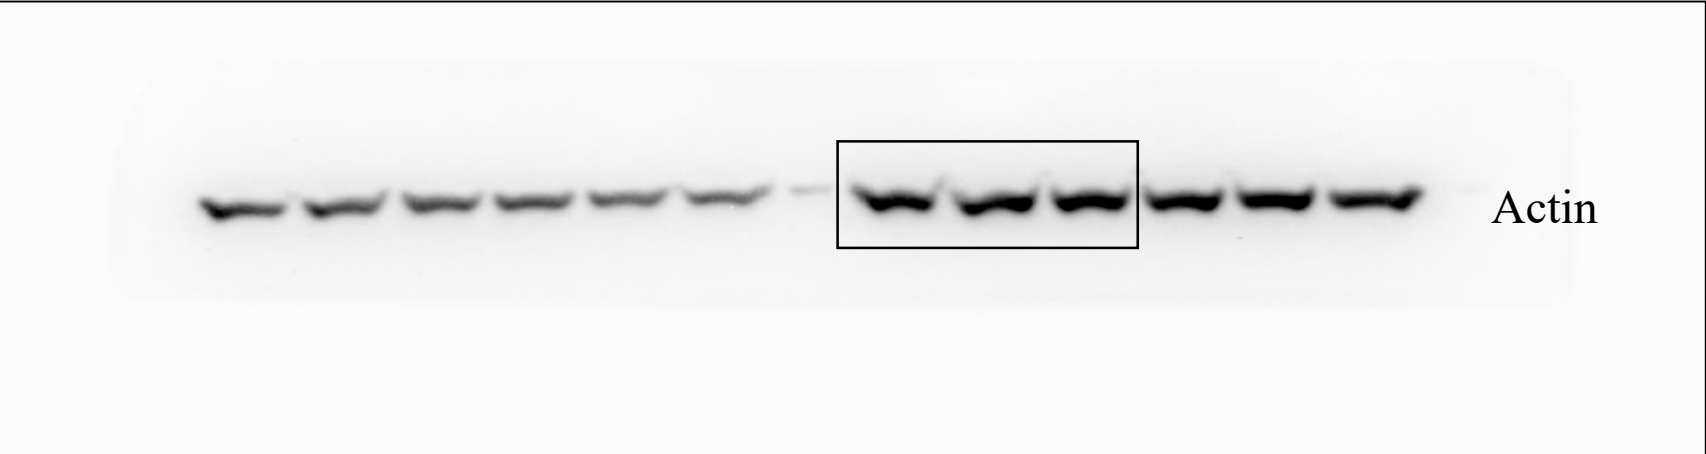

Figure S7B-Source data

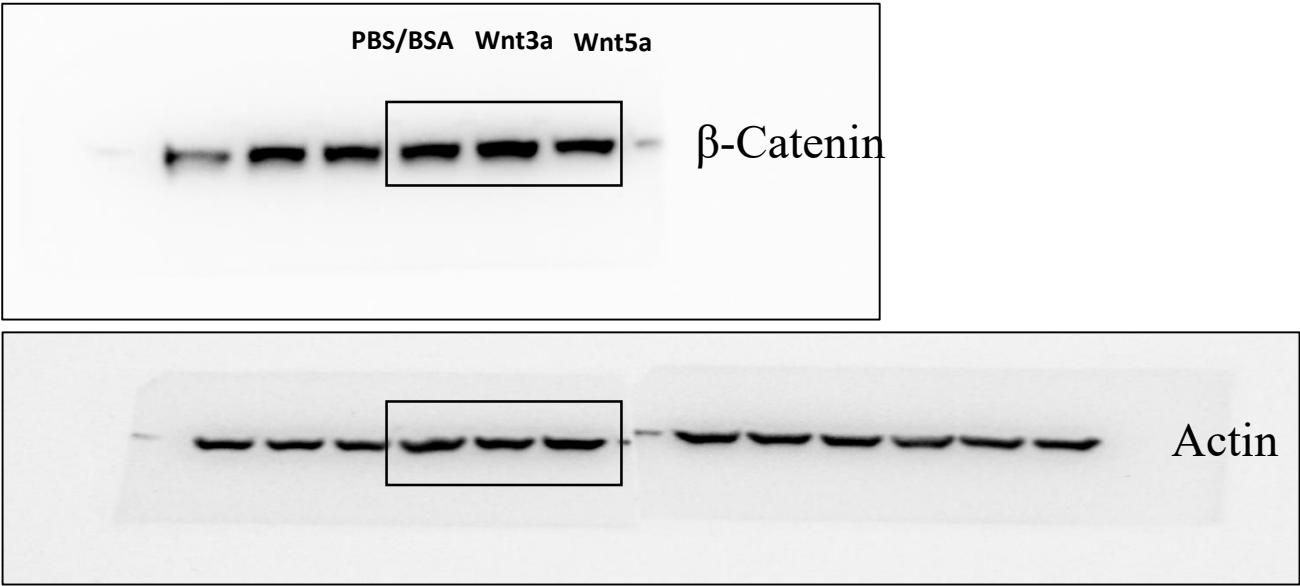

Figure S9B-Source data

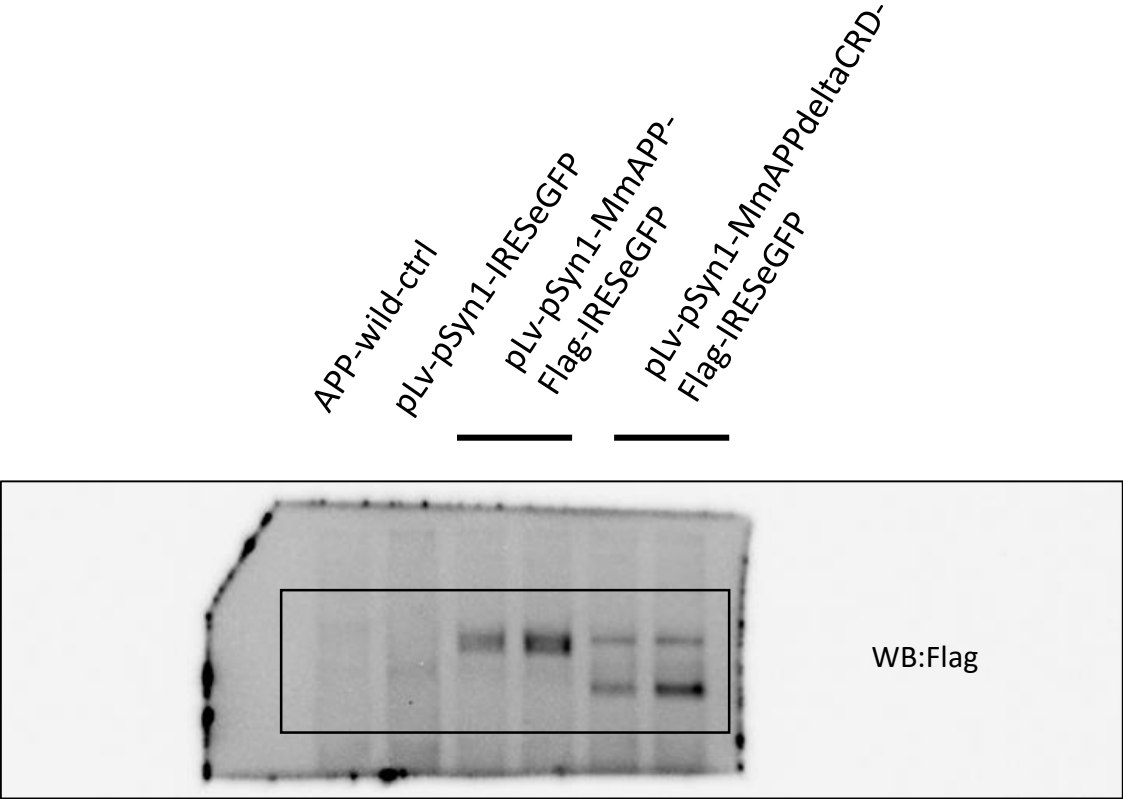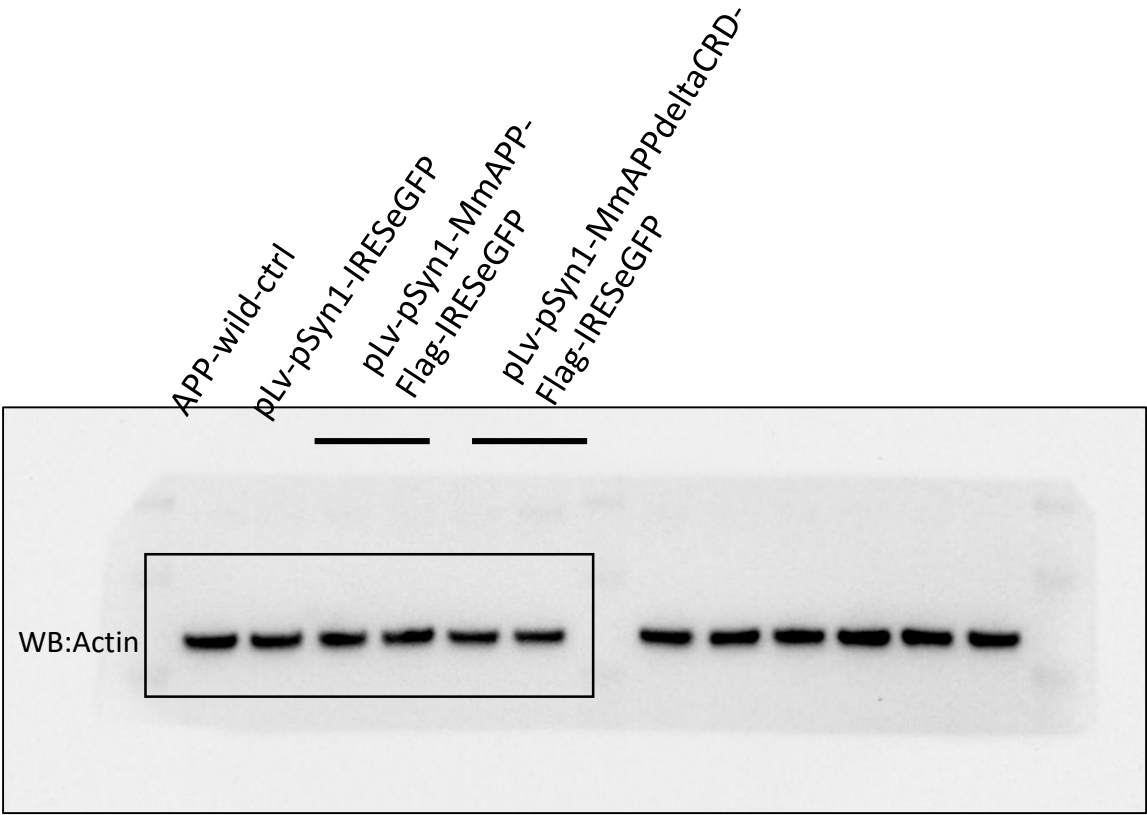

Figure S9C-Source data

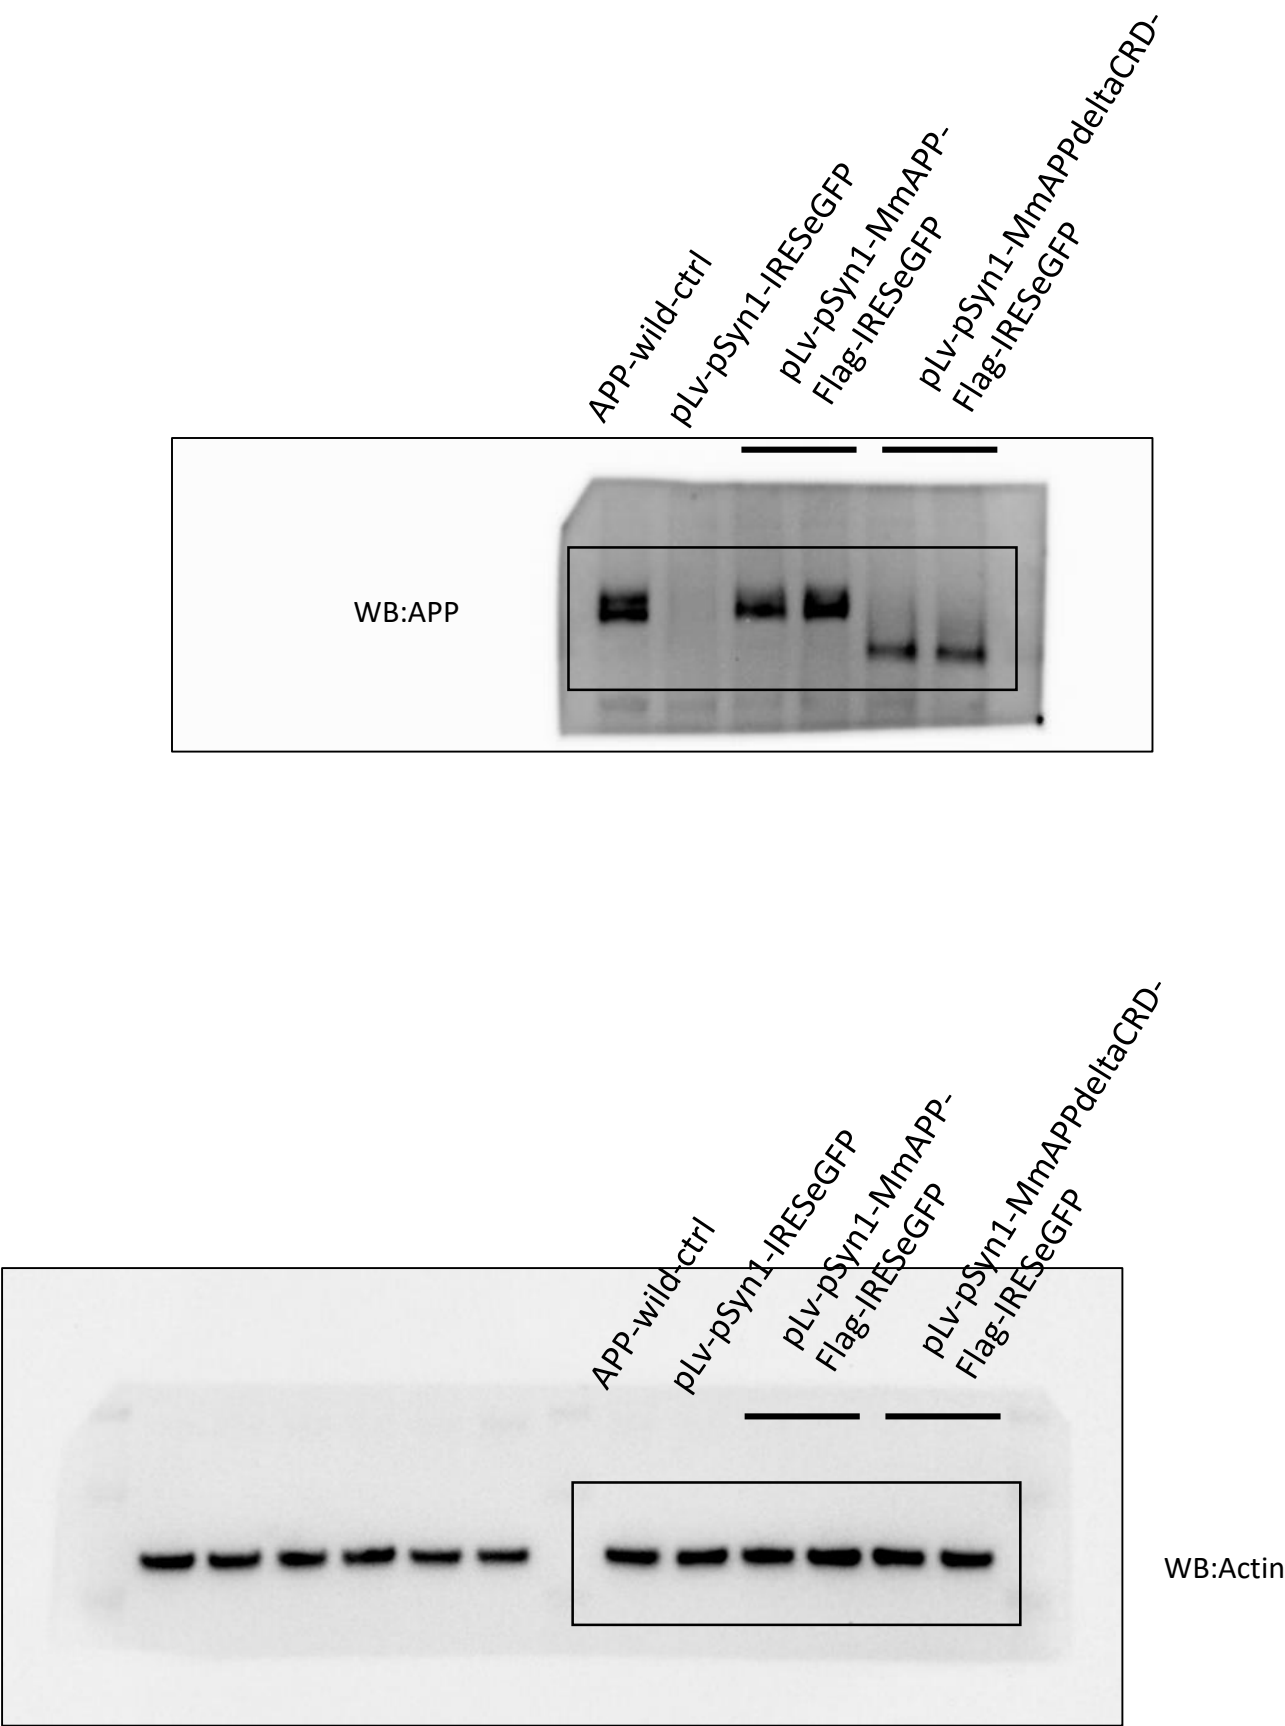

Figure S14-Source data

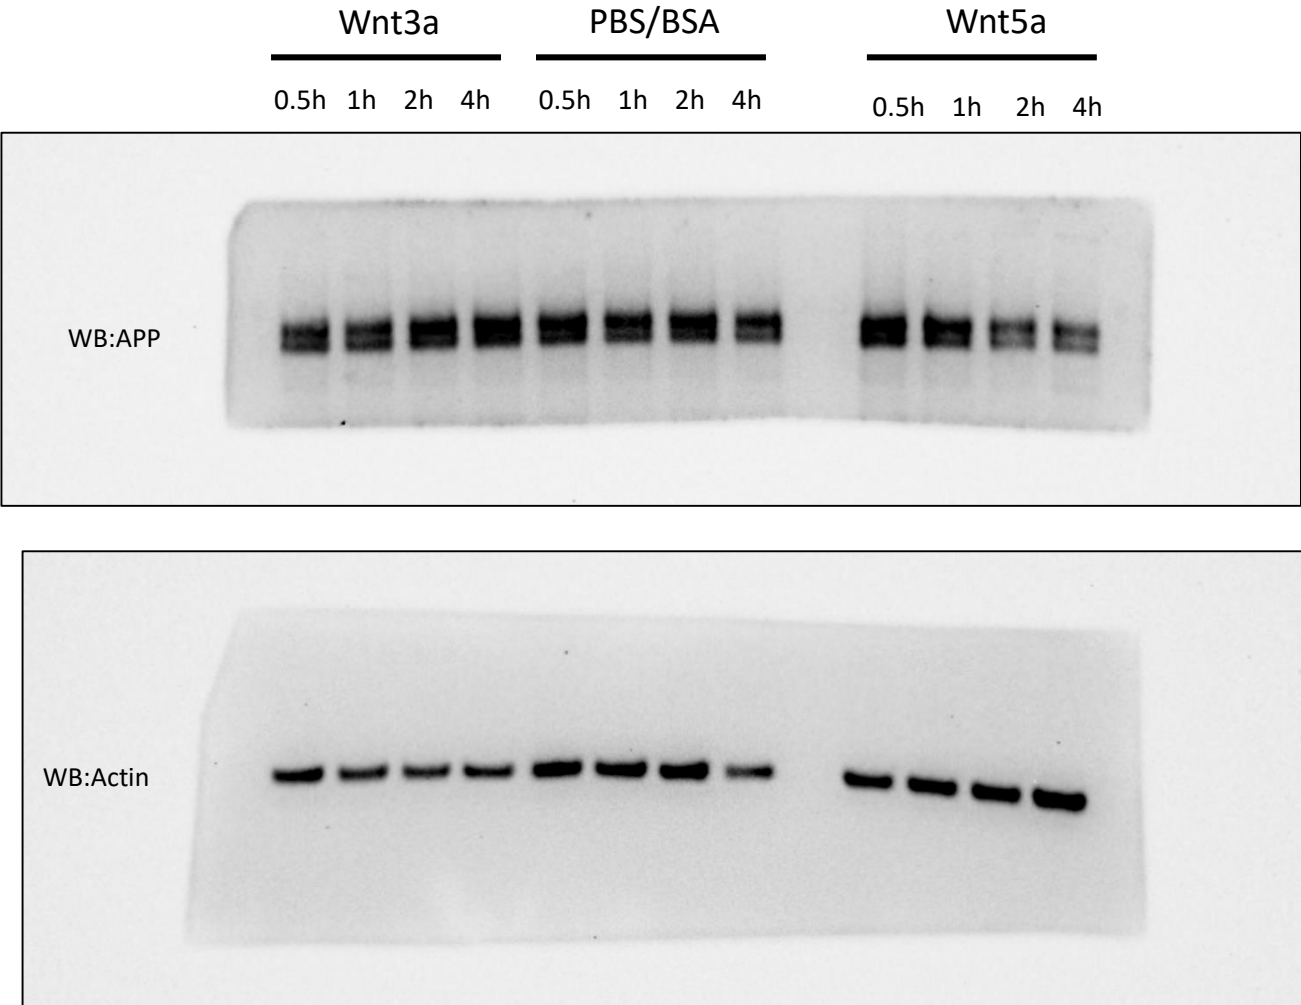

Supplement: fig3-figsupp4-data1 [file Figure 3-figure supplement 4-Source data 1 labeled bands.pdf › Figure 3-figure supplement 4/Figure 3-figure supplement 4-Source data 1 labeled bands.pdf]
