# Supplementary material for: The amyloid precursor protein is a conserved Wnt receptor
Source: eLife. 2021 Sep 9;10:e69199. doi: 10.7554/eLife.69199 (PMC8437438; doi:10.7554/eLife.69199)
Supplement: Supplementary file 1. — The table lists the penetrance of the phenotype and the number of brains analyzed in the Vang-Wnt5 genetic interaction experiment. [file elife-69199-supp1.xlsx]

## Sheet: Sheet1
		Table S1 Genetic interaction between Wnt5 and Vang
		Genotype	N	β_x000D_ loss
		Vang-/-	104	0.495
		Wnt5-/-	103	0.045
		Wnt5-/-; Vang-/-	98	0.0645
		Wnt5-/-; Vang-/+	80	0.0615
		Wnt5-/+; Vang-/+	92	0.521
