# Supplementary figures and images for: The amyloid precursor protein is a conserved Wnt receptor
Source: eLife journal article supplement (doi:10.7554/elife.69199), 2021-09-09

Figure 3F-Source data

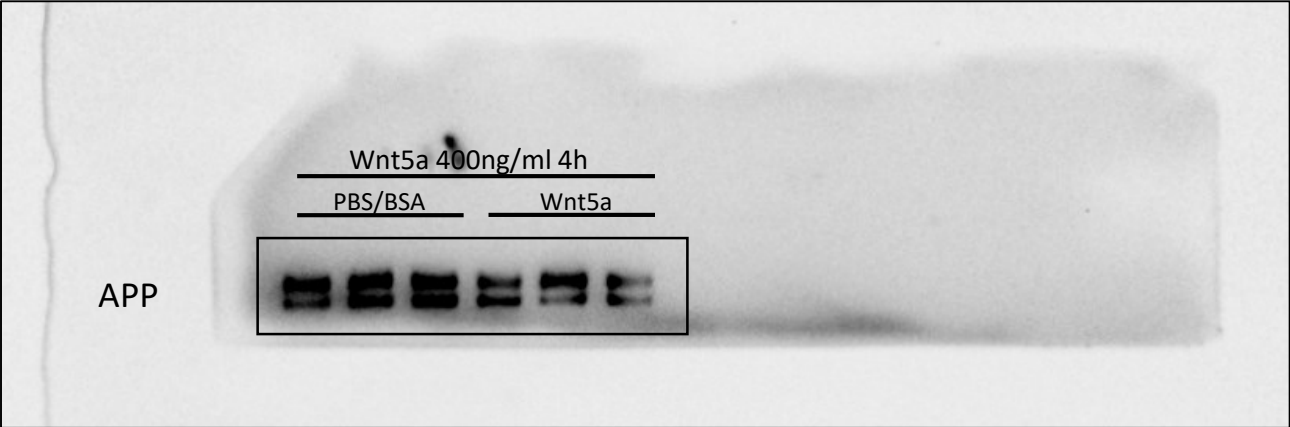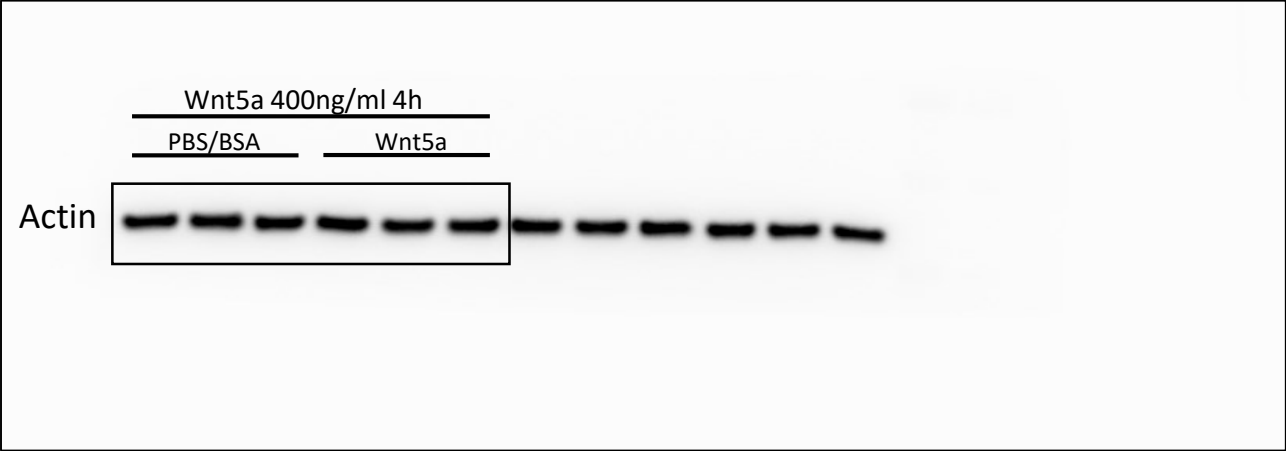

Supplement: fig3-data2 [file Figure 3F-Source data 1 labeled bands.pdf › Figure 3F_Source Data/Figure 3F-Source data 1 labeled bands.pdf]

Figure 3I-Source data

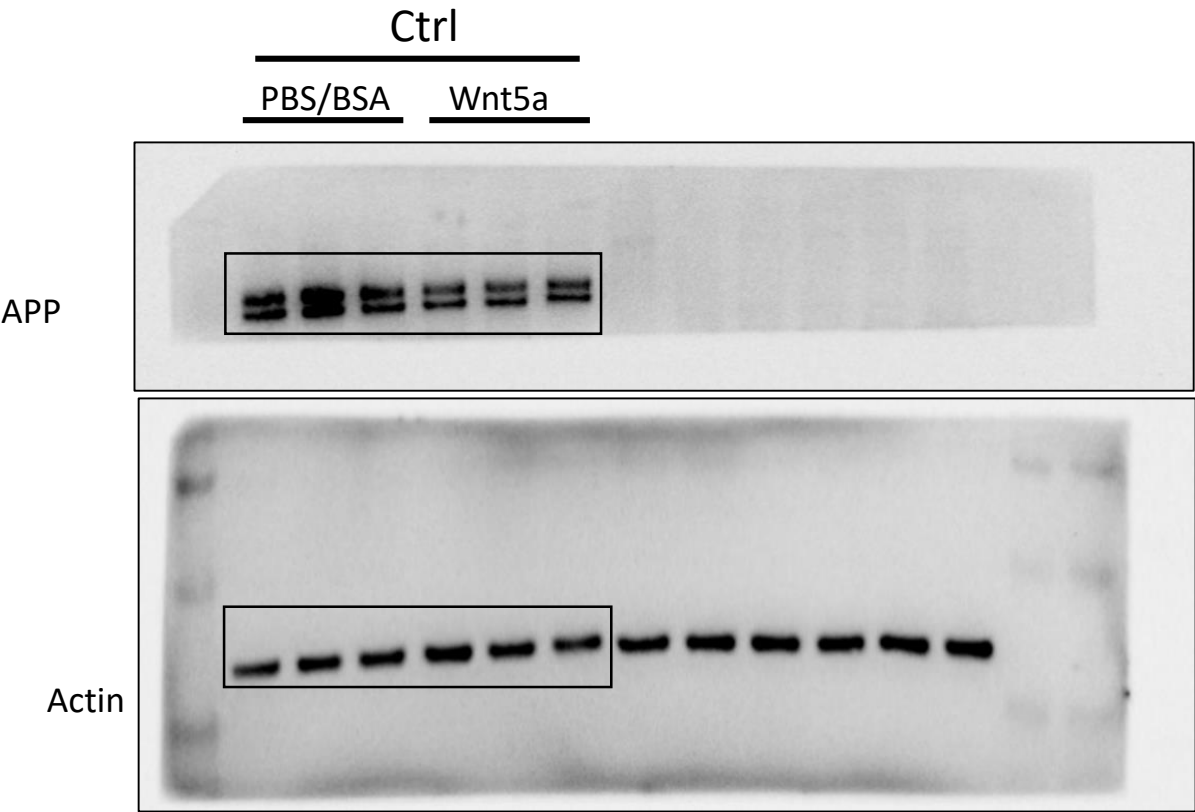

Supplement: fig3-data3 [file Figure 3I-Source data 1 labeled bands.pdf › Figure 3I_Source Data/Figure 3I-Source data 1 labeled bands.pdf]

Figure 3J-Source data

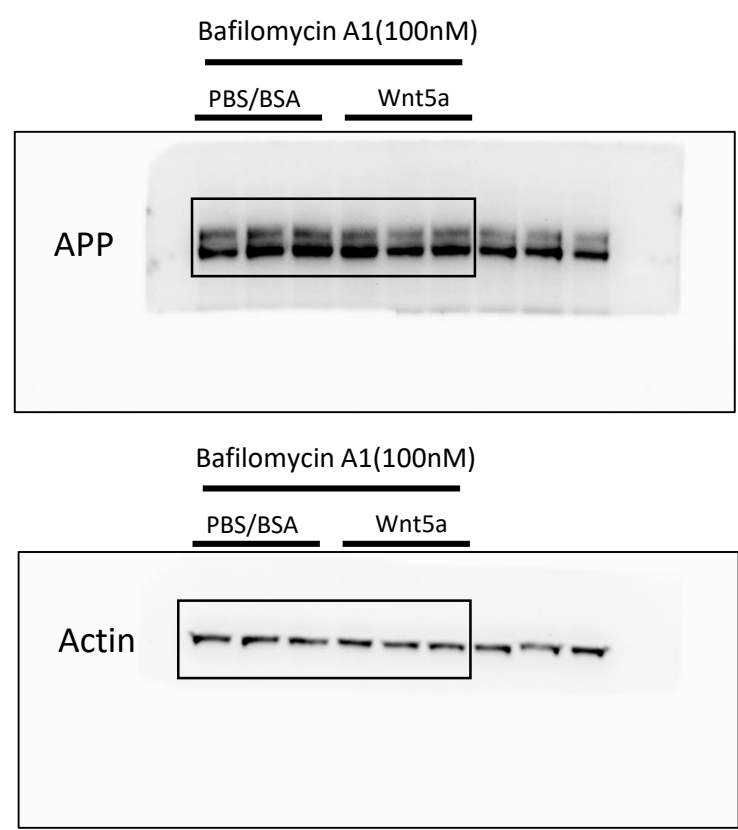

Supplement: fig3-data4 [file elife-69199-fig3-data4-v1.zip]

Figure S3A-Source data

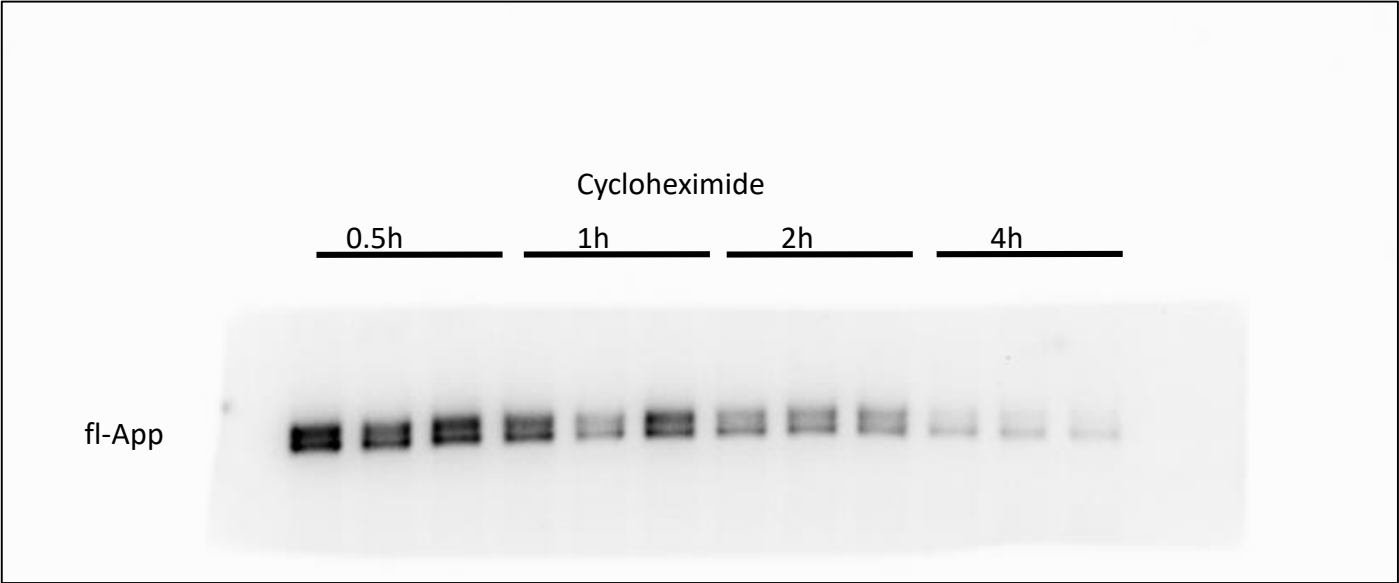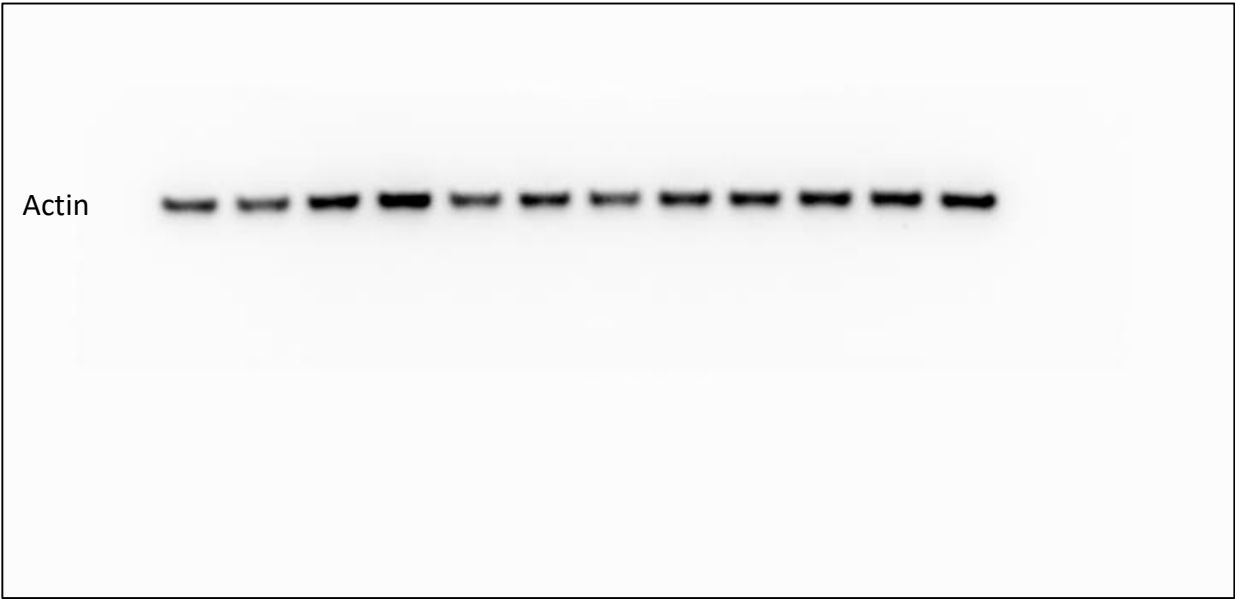

Supplement: fig3-figsupp1-data1 [file Figure 3- supplement 1A-Source data 1 labeled bands.pdf › Figure 3- supplement 1A_Source Data/Figure 3- supplement 1A-Source data 1 labeled bands.pdf]

Figure S3B-Source data

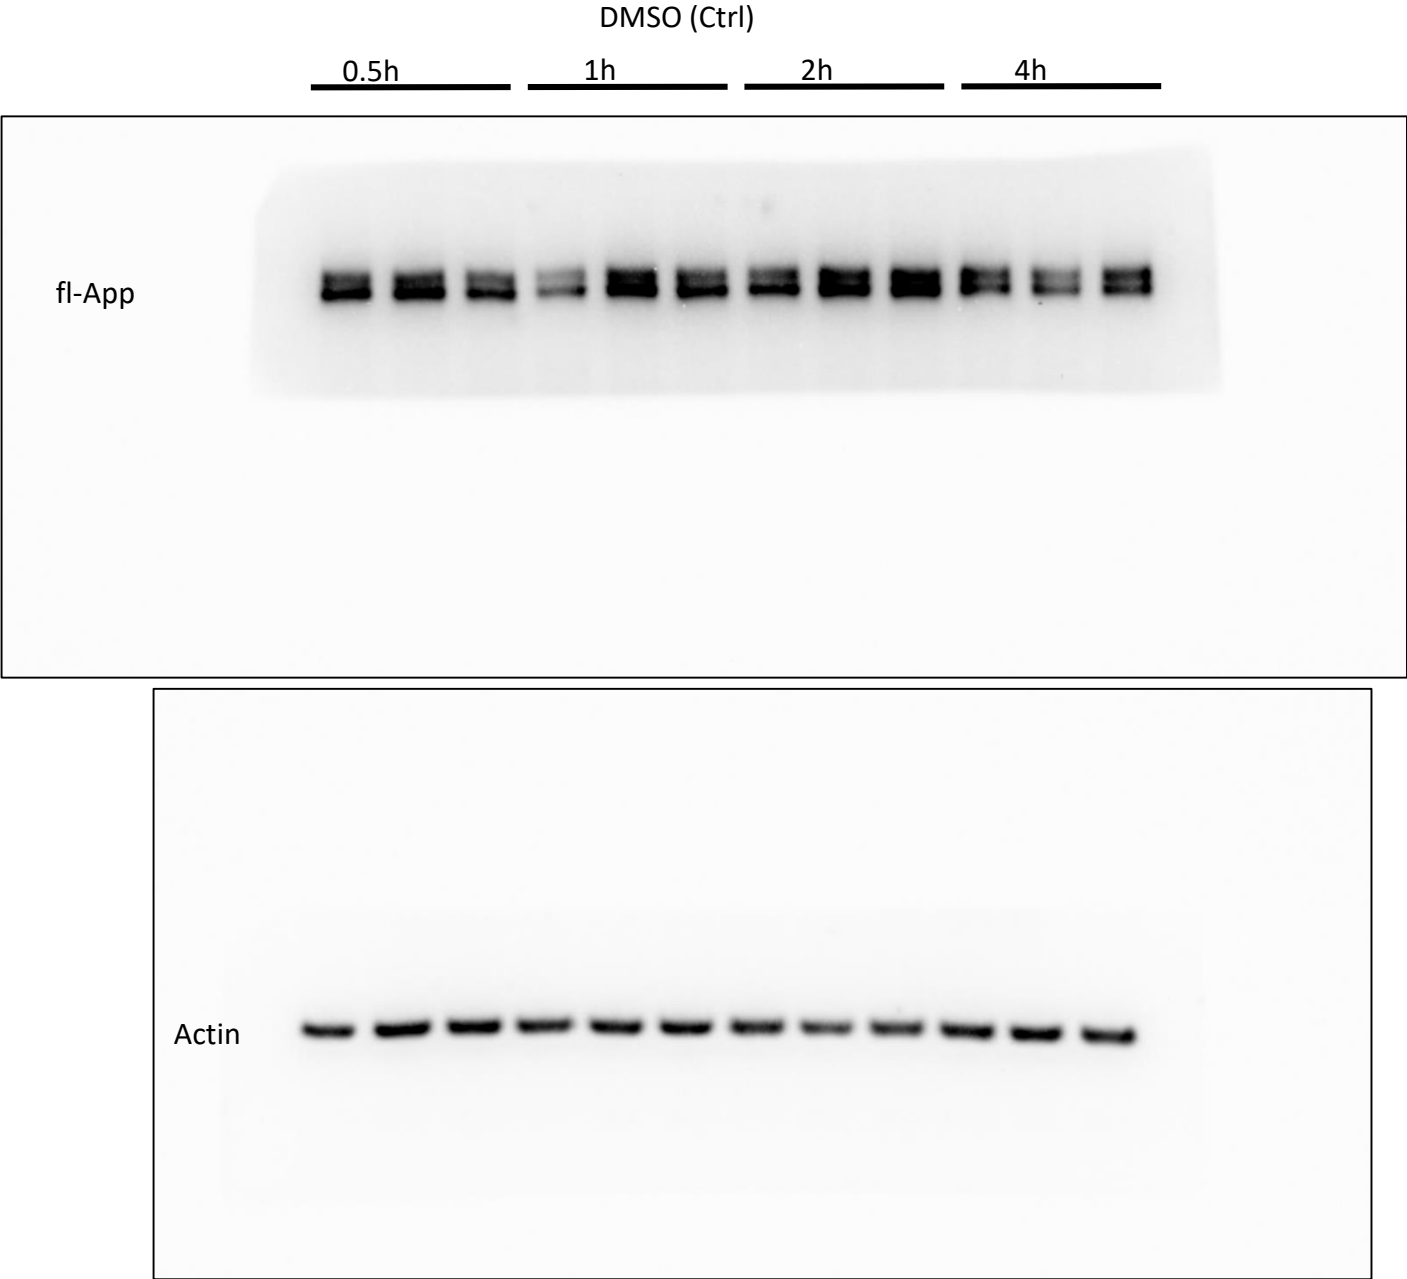

Supplement: fig3-figsupp1-data2 [file Figure 3- supplement 1B-Source data 1 labeled bands.pdf › Figure 3- supplement 1B_Source Data/Figure 3- supplement 1B-Source data 1 labeled bands.pdf]

Figure S14-Source data

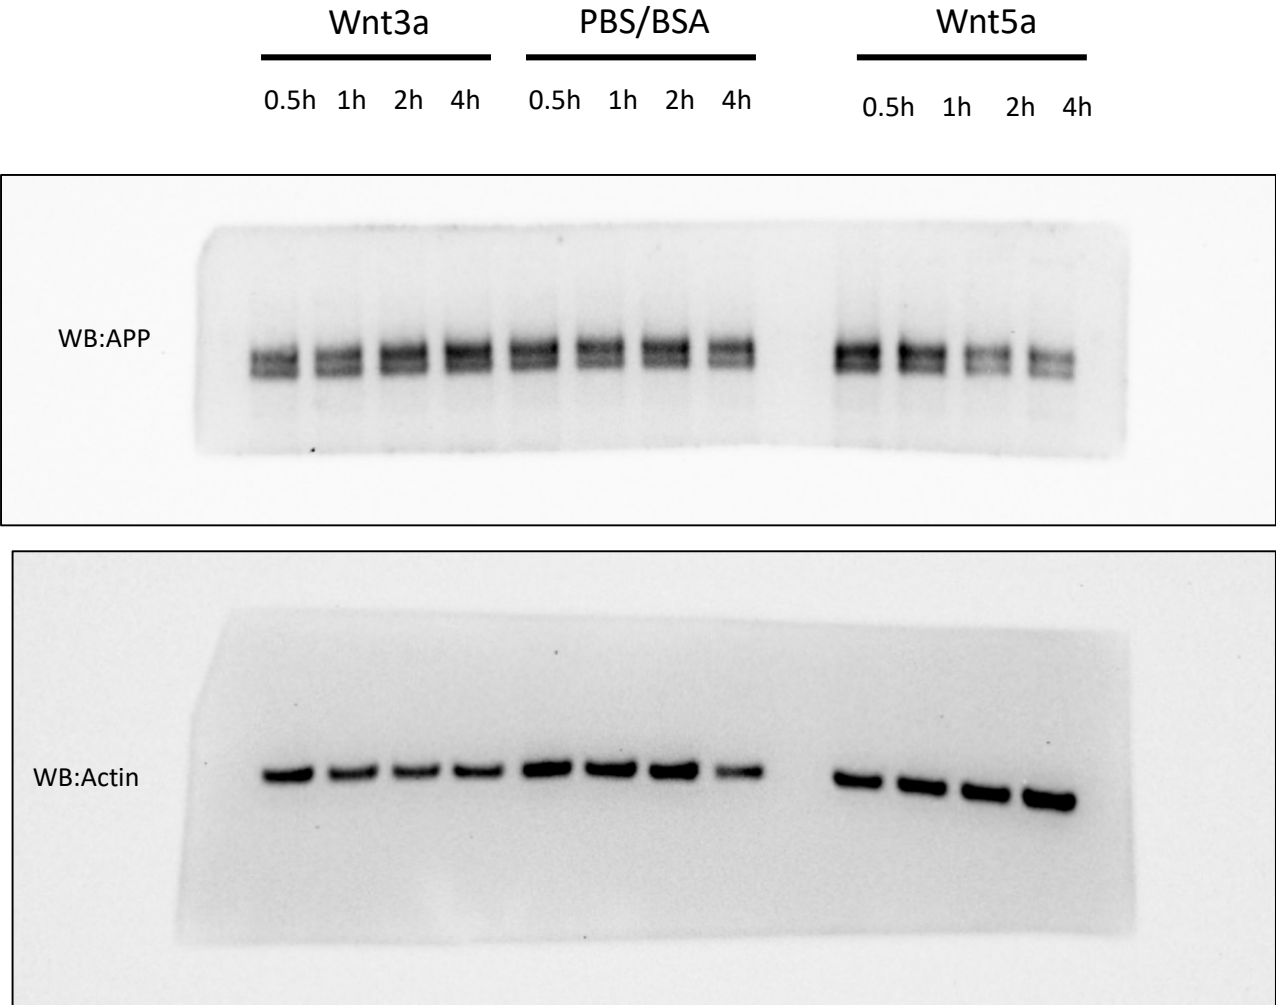

Supplement: fig3-figsupp5-data1 [file Figure 3-figure supplement 5-Source data 1 labeled bands.pdf › Figure 3-figure supplement 5-Source data 1 labeled bands.pdf]

Figure 4A-Source data

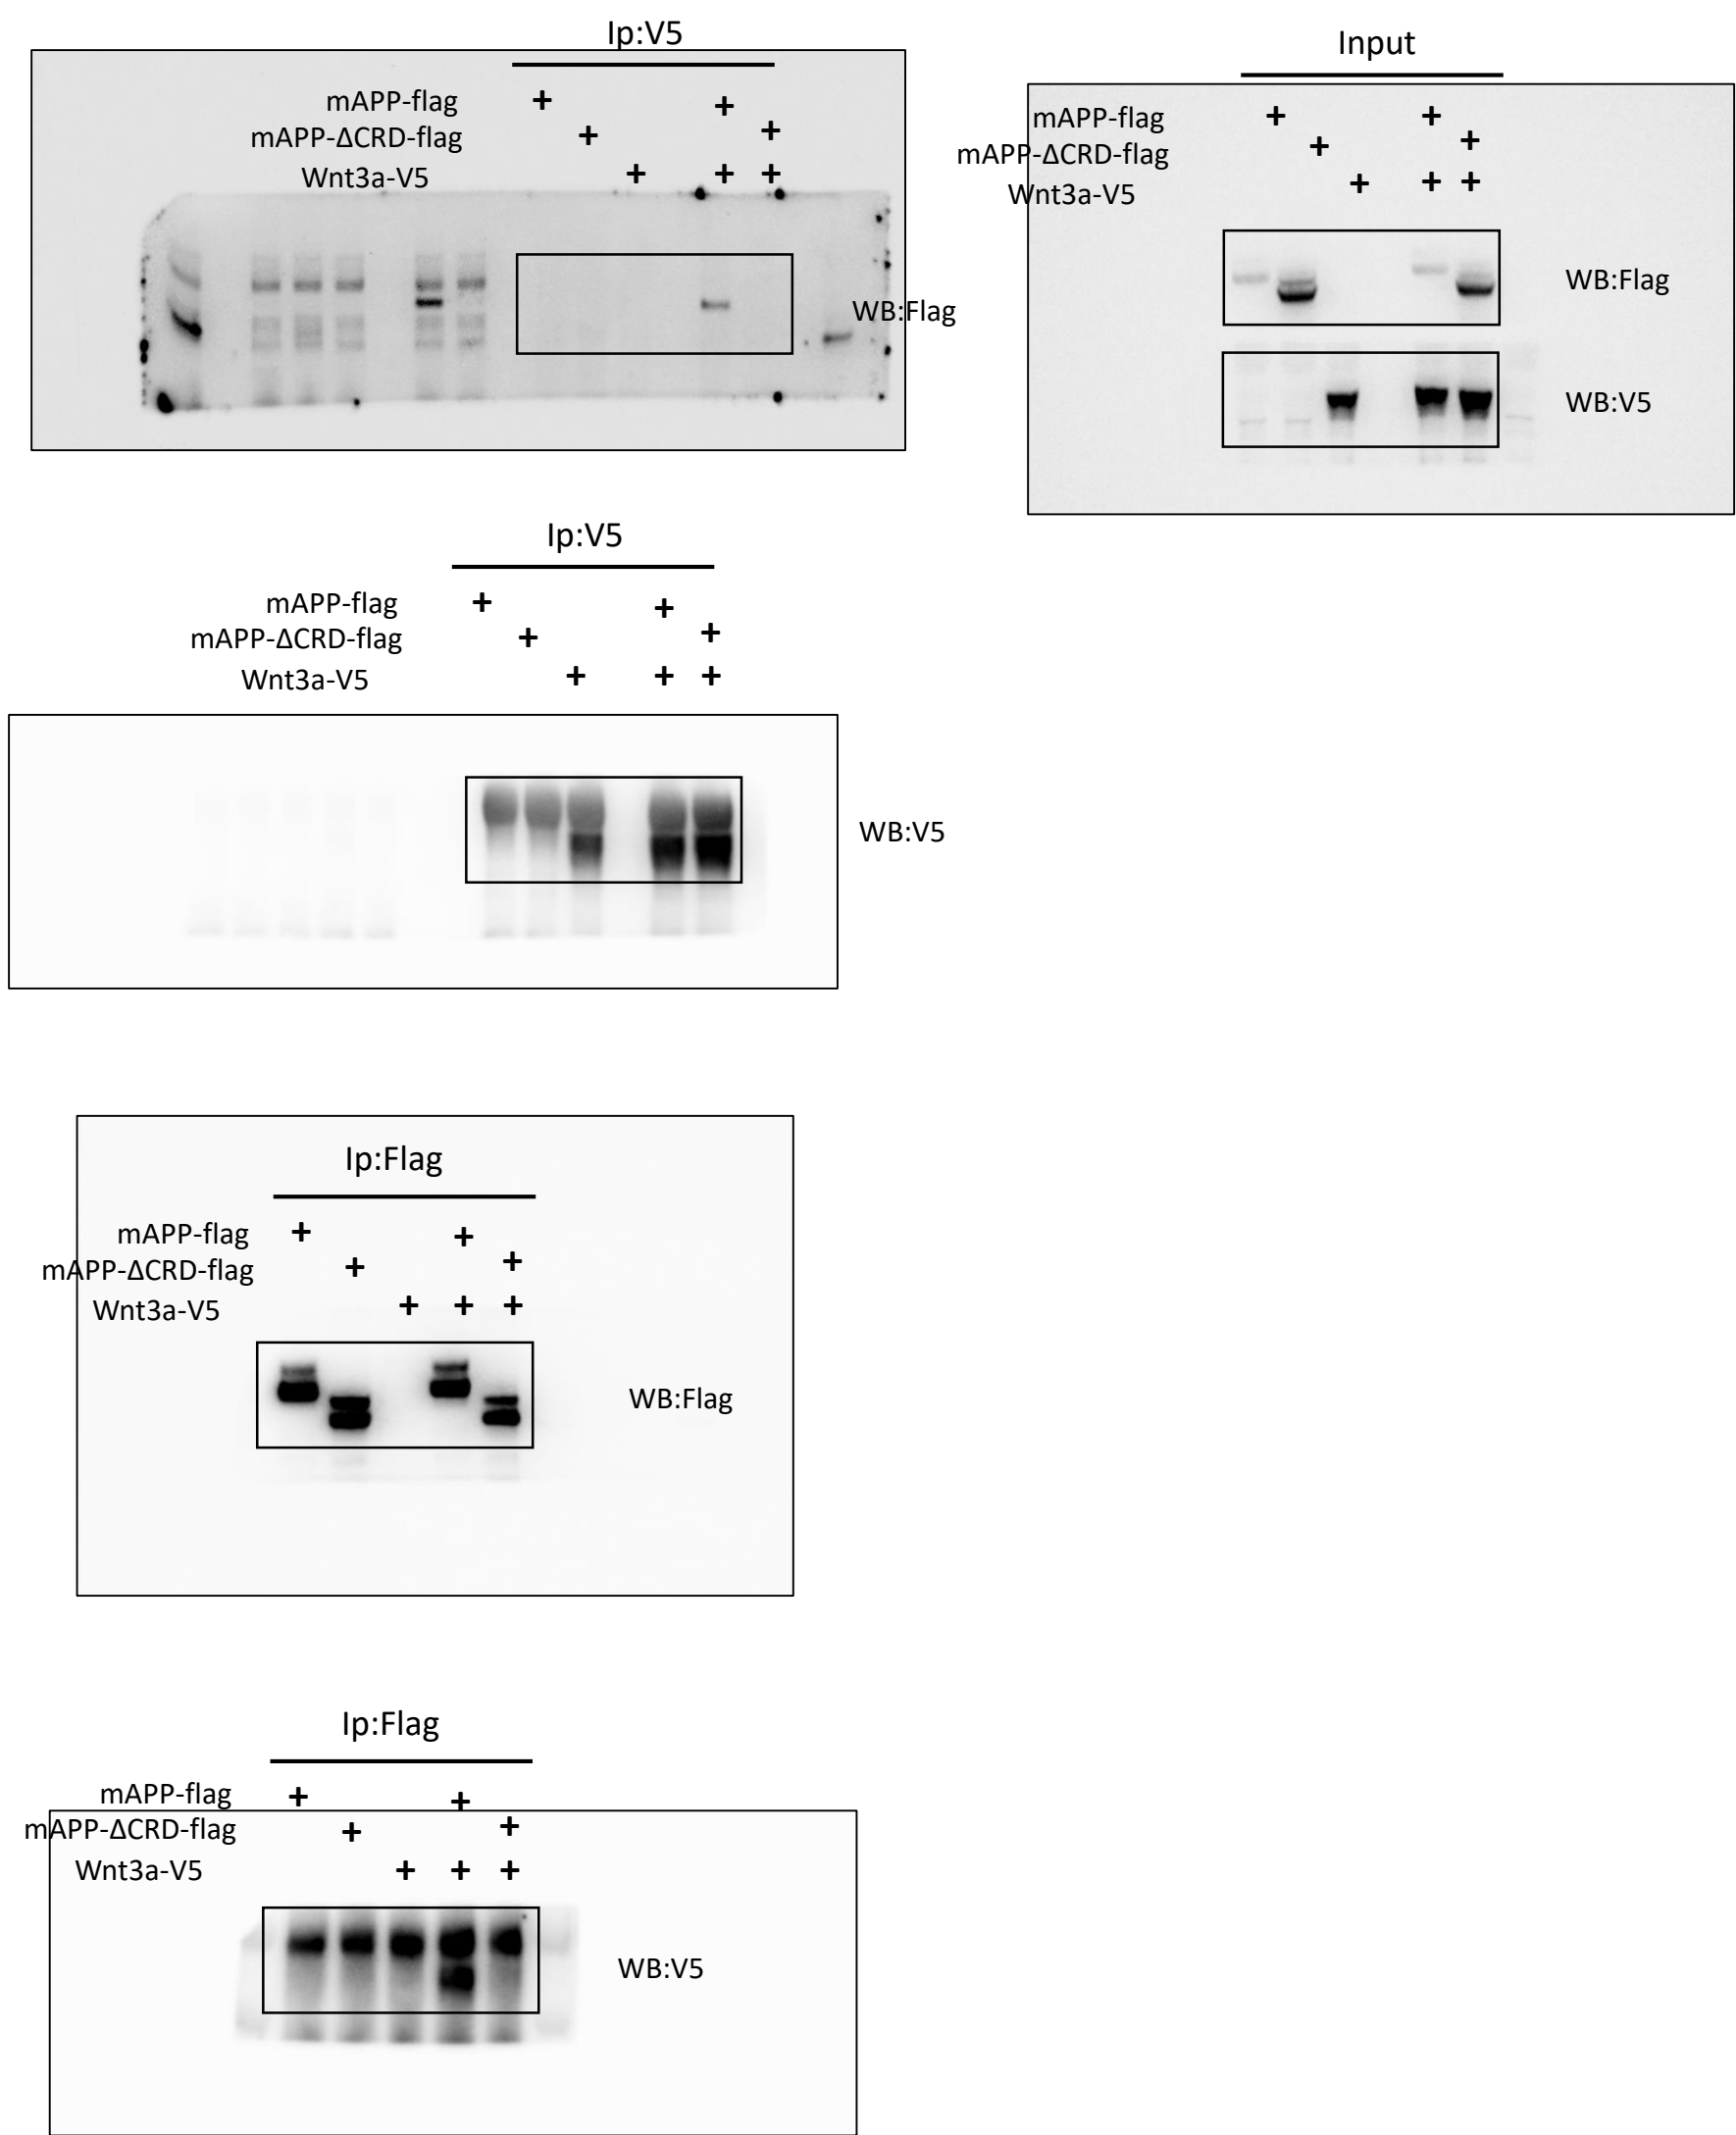

Supplement: fig4-data1 [file elife-69199-fig4-data1-v1.zip]

Figure 4F-Source data

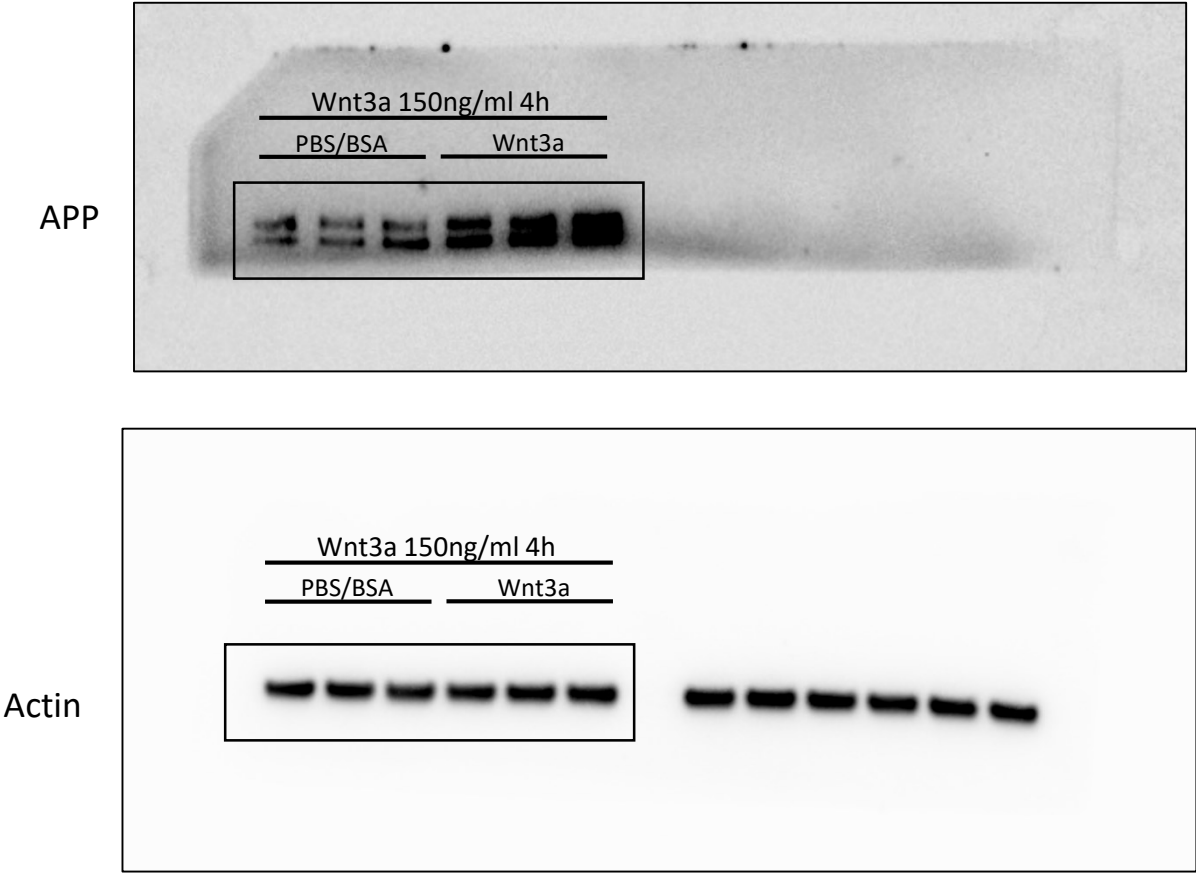

Supplement: fig4-data2 [file Figure 4F-Source data 1 labeled bands.pdf › Figure 4F_Source Data/Figure 4F-Source data 1 labeled bands.pdf]

Figure 4I-Source data

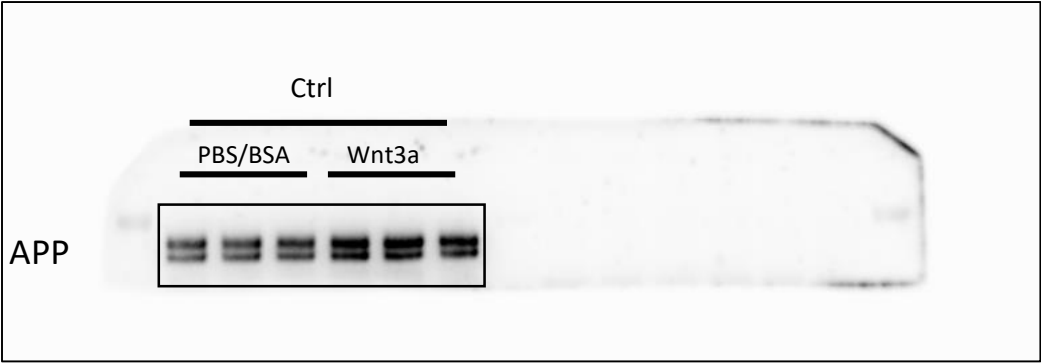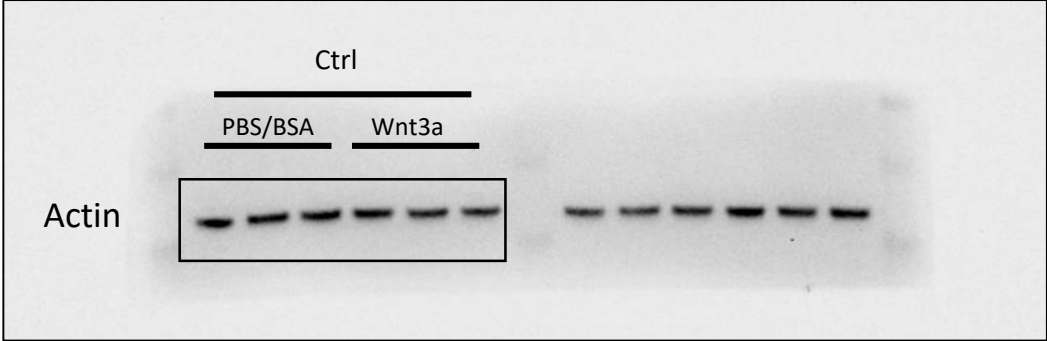

Supplement: fig4-data3 [file elife-69199-fig4-data3-v1.zip]

Figure 4J-Source data

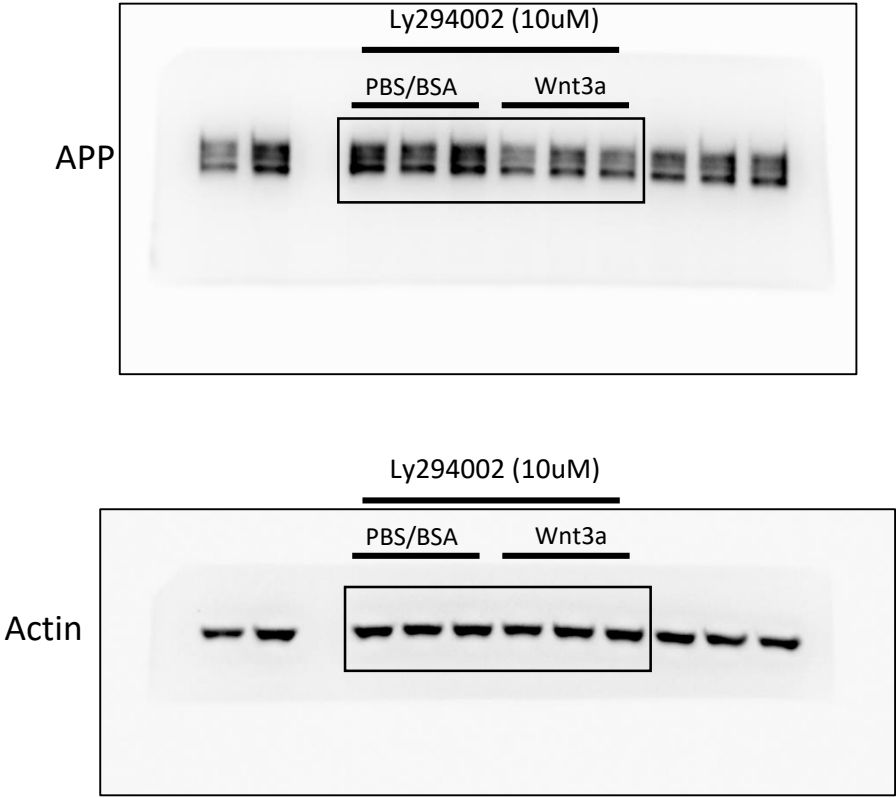

Supplement: fig4-data4 [file elife-69199-fig4-data4-v1.zip]

Figure 4M-Source data

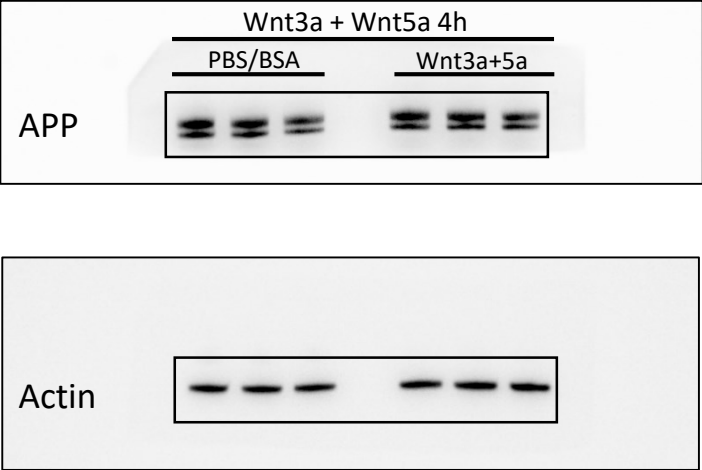

Supplement: fig4-data5 [file Figure 4M-Source data 1 labeled bands.pdf › Figure 4M_Source Data/Figure 4M-Source data 1 labeled bands.pdf]

Figure S7A-Source data

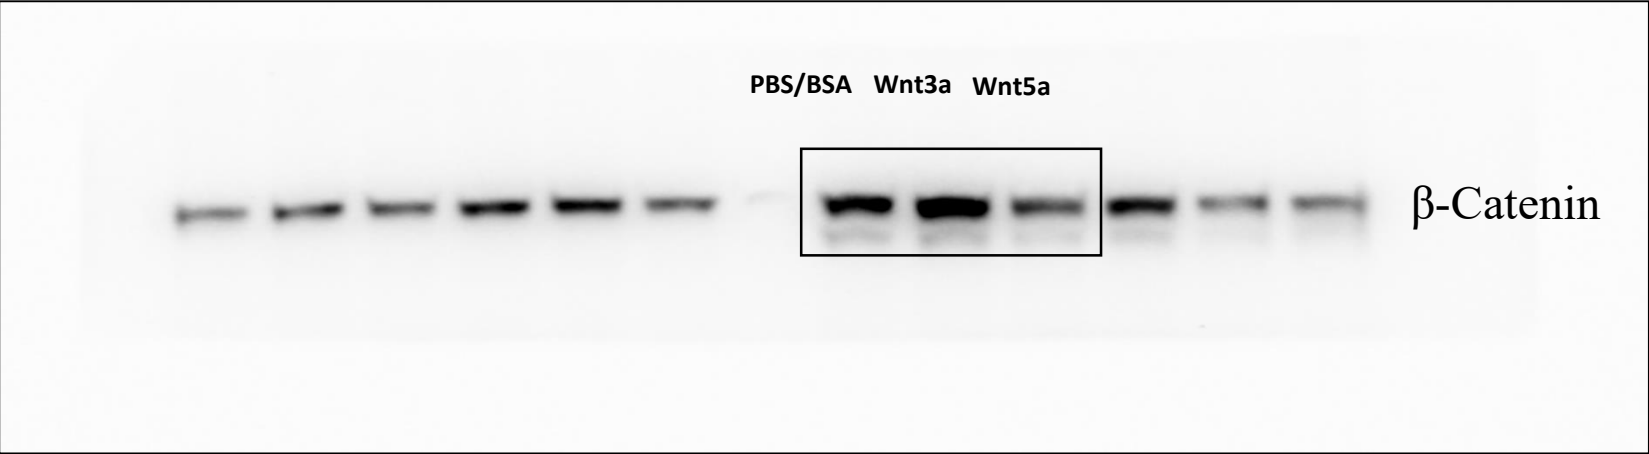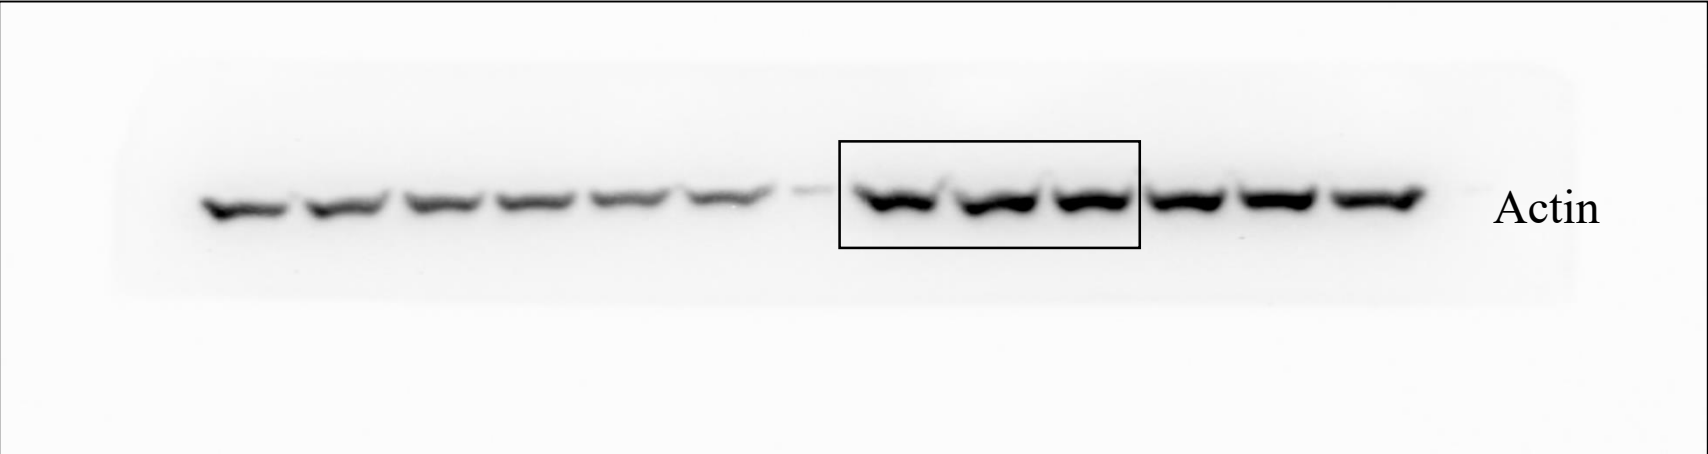

Supplement: fig4-figsupp1-data1 [file Figure 4-supplement 1A-Source data 1 labeled bands.pdf › Figure 4-supplement 1A_Source Data/Figure 4-supplement 1A-Source data 1 labeled bands.pdf]

Figure S7B-Source data

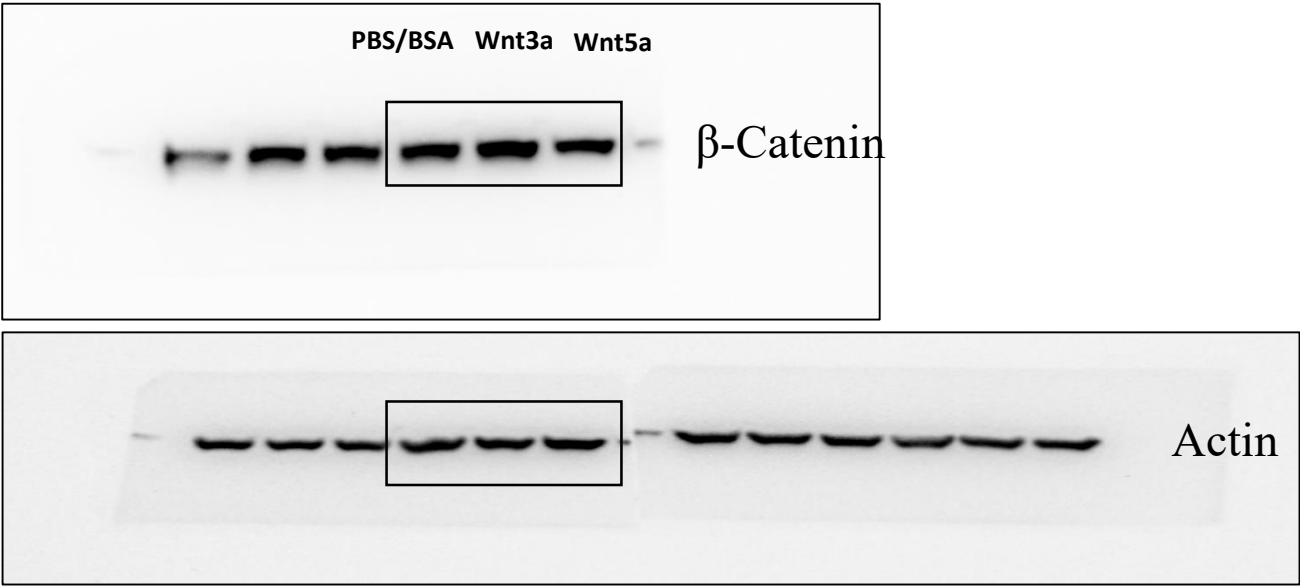

Supplement: fig4-figsupp1-data2 [file Figure 4-supplement 1B-Source data 1 labeled bands.pdf › Figure 4-supplement 1B_Source Data/Figure 4-supplement 1B-Source data 1 labeled bands.pdf]

Figure 5A-Source data

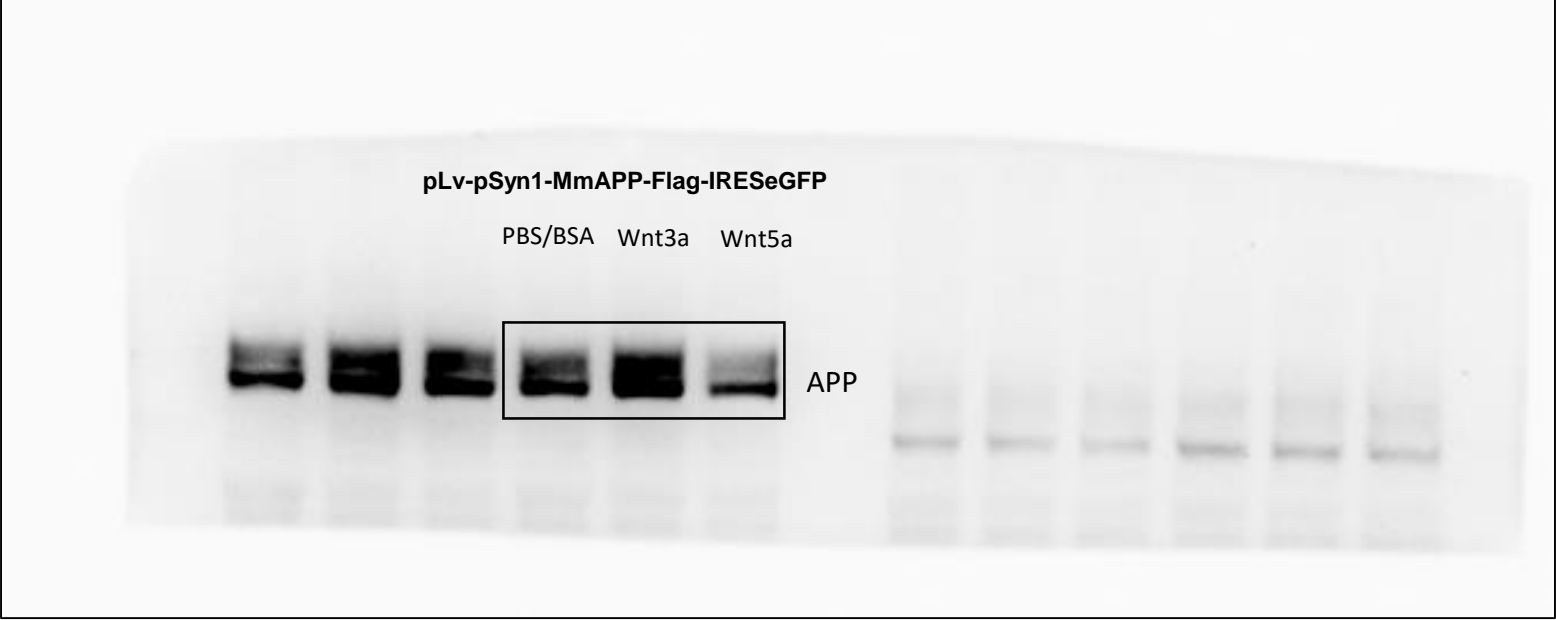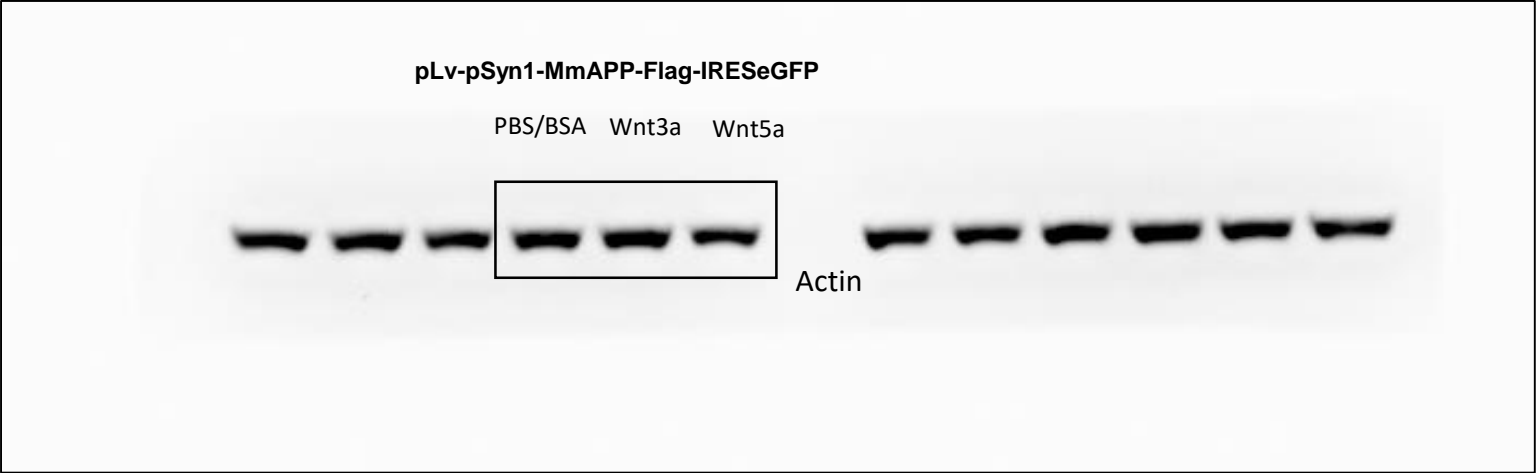

Supplement: fig5-data1 [file elife-69199-fig5-data1-v1.zip]

Figure 5B-Source data

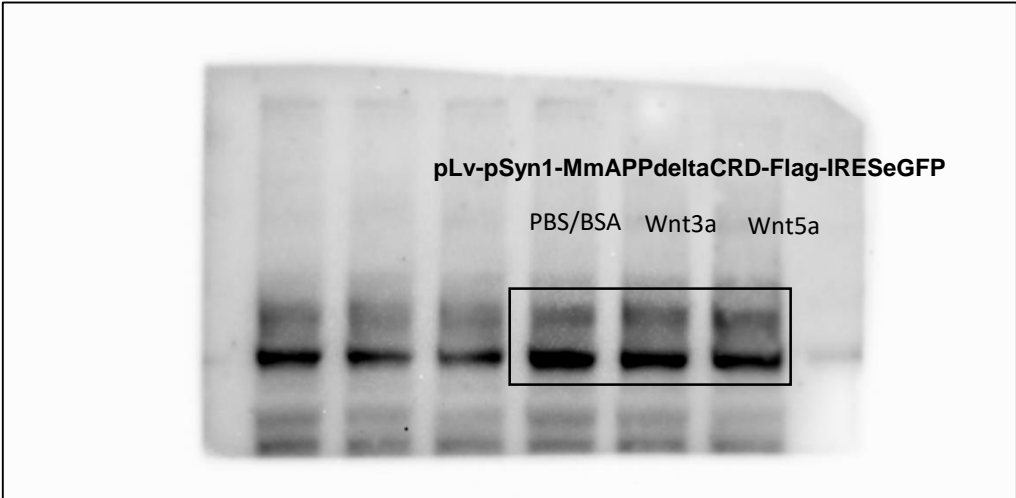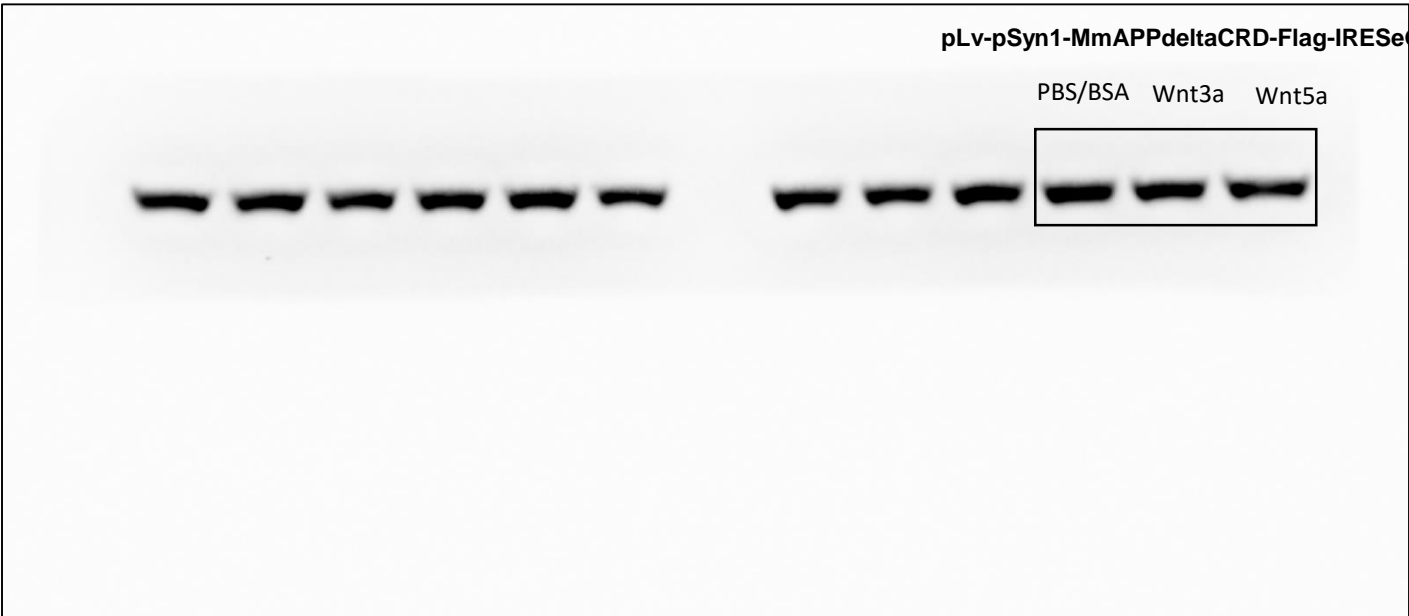

Supplement: fig5-data2 [file Figure 5B-Source data 1 labeled bands.pdf › Figure 5B_Source Data/Figure 5B-Source data 1 labeled bands.pdf]

Figure S9B-Source data

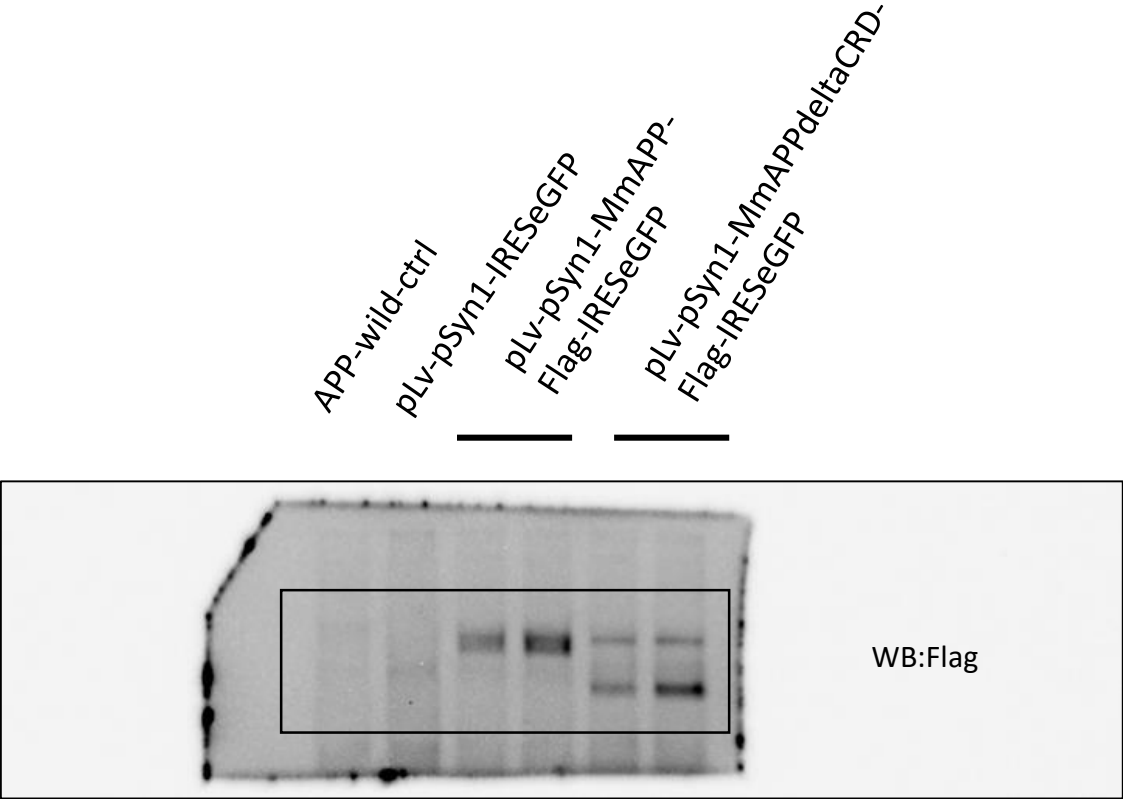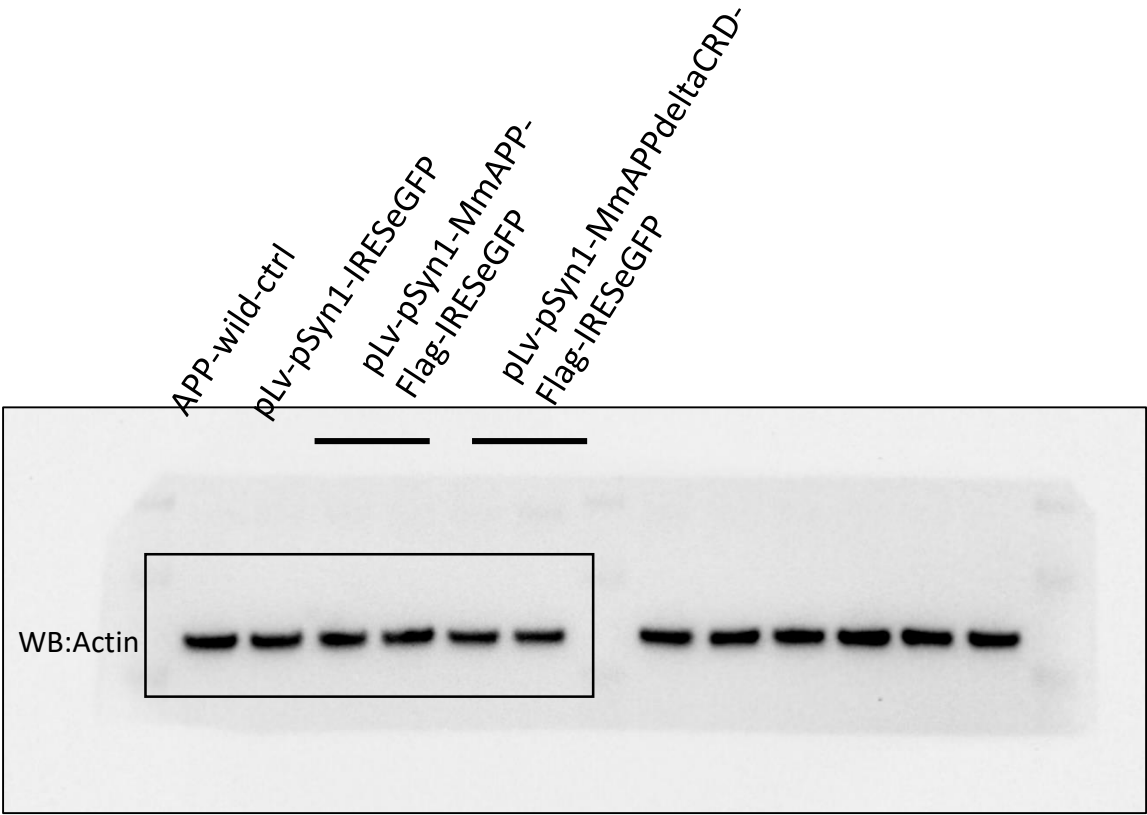

Supplement: fig5-figsupp1-data1 [file Fig 5 supplement 1B-Source data 1 labeled bands.pdf › Figure 5 supplement 1B_Source Data/Fig 5 supplement 1B-Source data 1 labeled bands.pdf]

Figure S9C-Source data

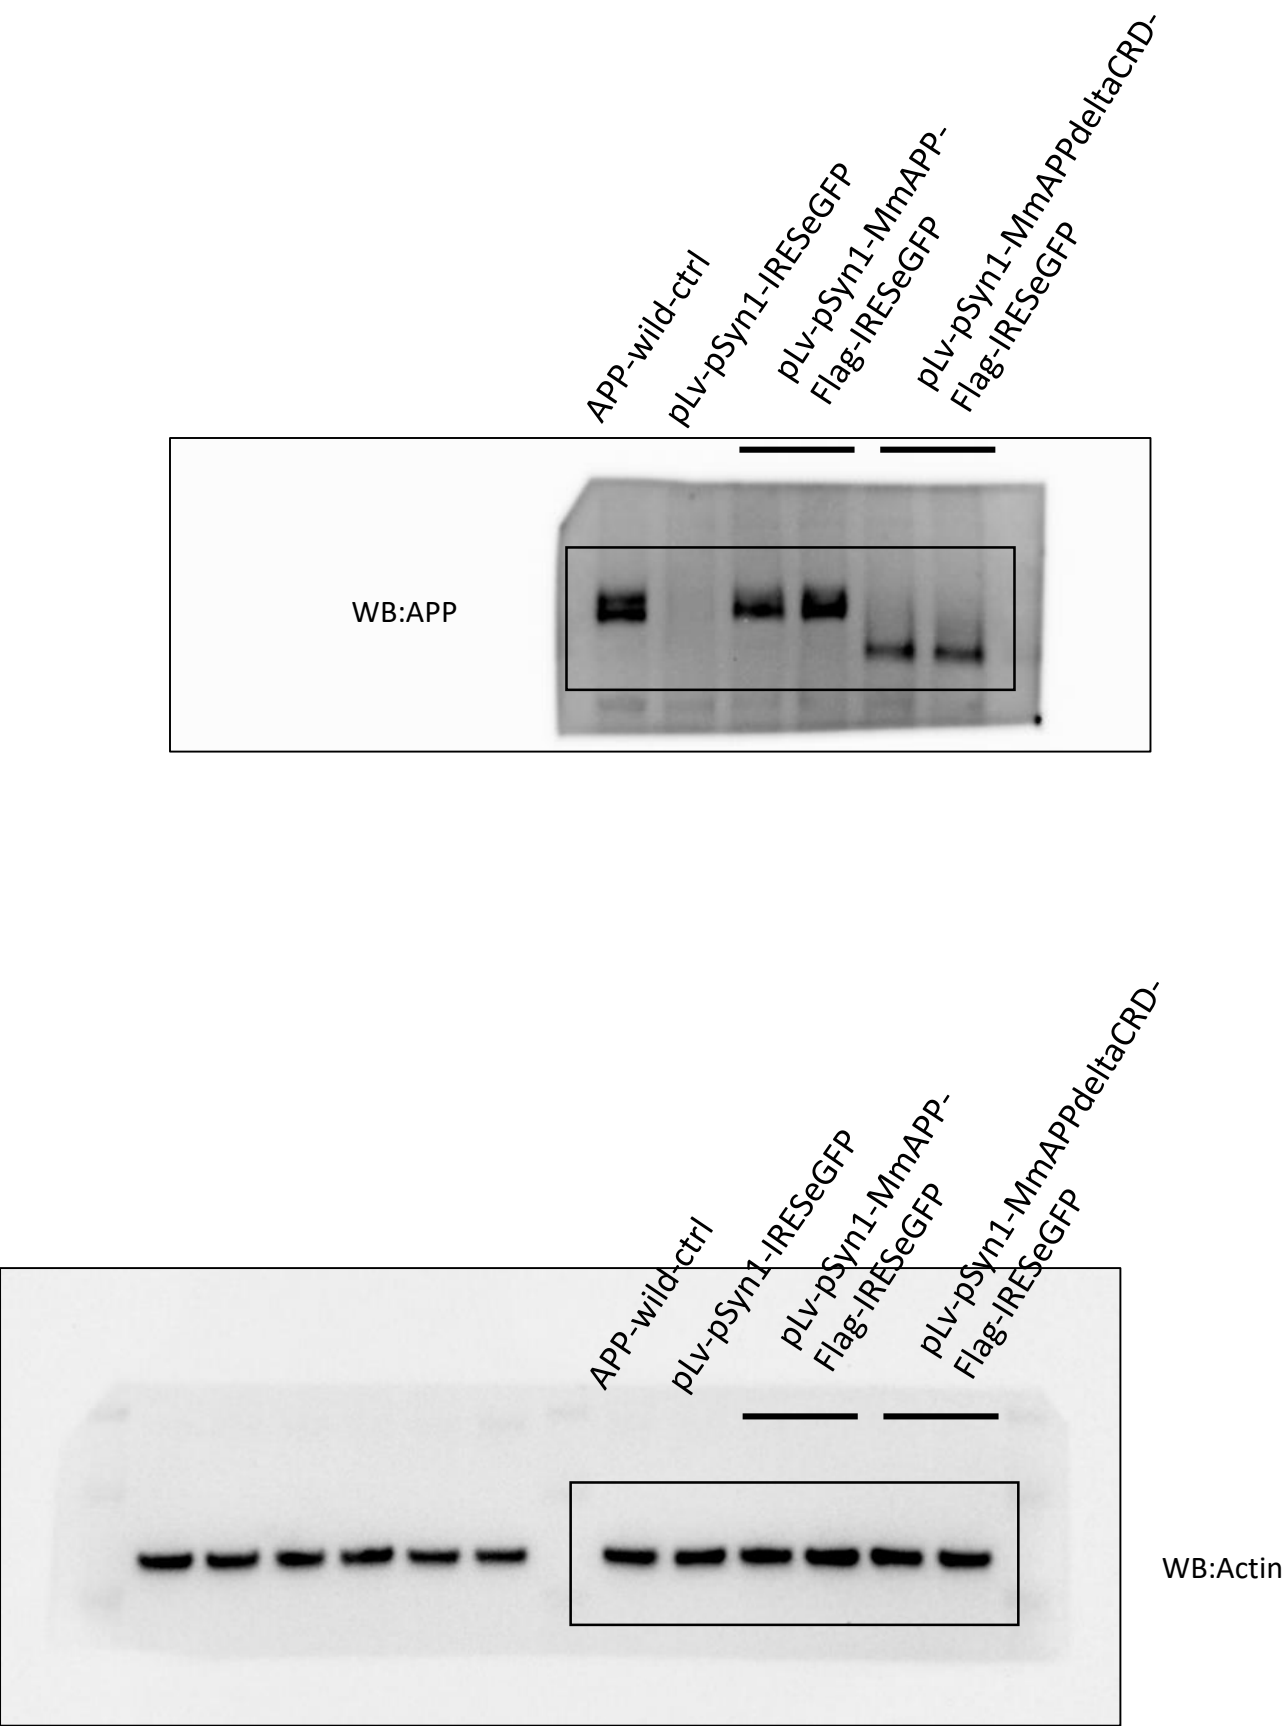

Supplement: fig5-figsupp1-data2 [file Fig 5 supplement 1C-Source data 1 labeled bands.pdf › Figure 5 supplement 1C_Source Data/Fig 5 supplement 1C-Source data 1 labeled bands.pdf]
